# Supplementary material
Source: Springer Nature journal article supplement (https://www.springermedizin.de/resource/supplementary/12905_2011_283_MOESM3_ESM.pdf/9518362)

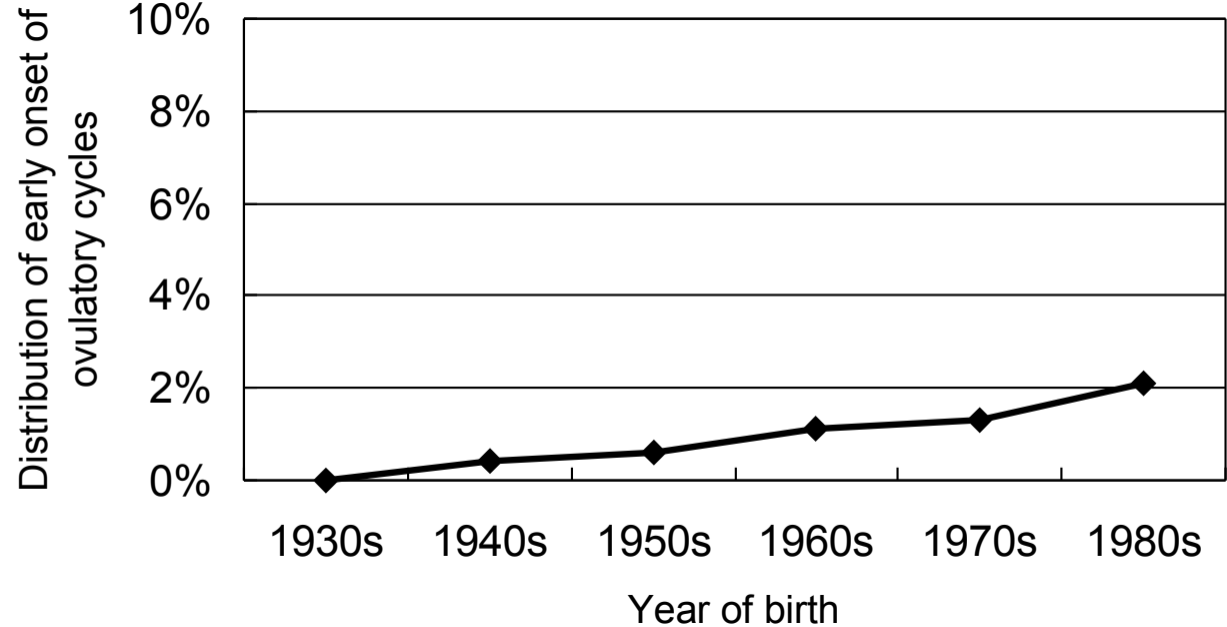

Supplement: MOESM3 [file 9518362]
